# Supplementary material
Source: Springer Nature journal article supplement (http://www.nature.com/nature/journal/v414/n6863/extref/414555ac.pdf)
Supplement: 414555ac.pdf [file 414555ac.pdf]

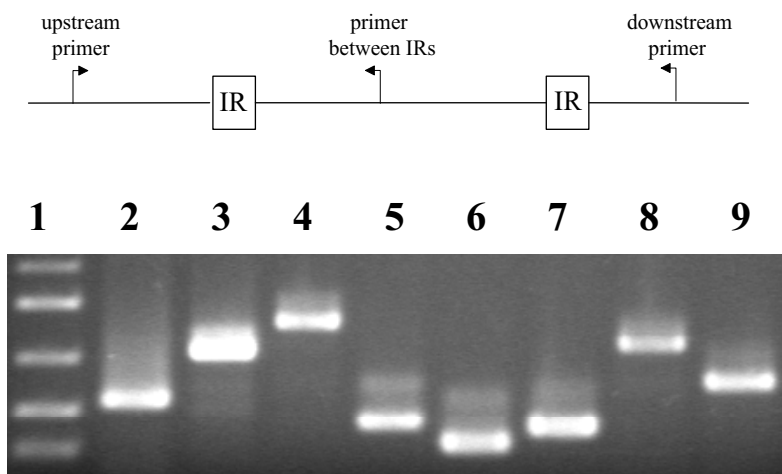

Web Fig. 3. PCR analysis demonstrating DNA inversion of the regions upstream the PS E, PS F, PS G, and PS H loci. A primer between the indicated IR region was used with PS E upstream primer (2), PS E downstream primer (3), PS F upstream primer (4), PS F downstream primer (5), PS G upstream primer (6), PS G downstream primer (7), PS H upstream primer (8), PS H downstream primer (9).
